# Supplementary material for: Evaluation and Application of Molecular Marker Sets for Developing PHS-Resistant Wheat in Korea
Source: Research Square preprint supplement (doi:10.21203/rs.3.rs-6951628/v1), 2025-09-29
Supplement: Supplementary file 1 [file da6f74b330cfbde602bcfd37.xlsx]

## Sheet: S1
S1. List of wheat cultivars, lines, and germplasms selected for MABC and their agronomic and quality traits (’22/’23).
No.	Name	Agronomic Traits				Flour Quality
		HDa	MDb	TGWc	LWd	PCe	GIf	SDSSg
		(m.dd)	(m.dd)	(g)	(g)	(%)		(ml)
1	Alchanmil	4.23	6.3	35.8	795	10.8	69.6	56
2	Ariheukchal	4.22	6.5	37	789	15.6	-	71.8
3	Baekchal	4.29	6.9	45.8	793	14.2	-	73.5
4	Baekjoong	4.2	6.6	45.6	803	10.7	79.6	36.5
5	Baekkang	4.2	6.3	50.2	800	11.8	71.9	53.1
6	Chokwang	4.28	6.9	45	795	11.3	67	31.1
7	Dabunmil	4.14	6.2	42.8	754	13.4	72.3	53.6
8	Geurumil	4.22	6.4	40.2	781	12.3	55.5	44.1
9	Hanbaekmil	4.15	6.5	53.4	745	14.8	87.2	65.7
10	Hwanggeumal	4.22	6.1	46.3	788	13.7	75.3	59.2
11	Jeokjoongmil	4.2	6.4	43.5	791	10.6	80.5	36.3
12	Joeunmil	4.19	6.5	36.8	790	14.7	61.2	43.5
13	Johan	4.15	6.2	35.6	766	11.8	-	56.5
14	Jokyoung	4.2	6.2	51.9	799	11.6	95.9	53.7
15	Jonong	4.12	6.1	46.8	775	14.6	85.3	60.8
16	Jopummil	4.3	6.9	37.7	788	13.3	66.3	65.2
17	Keumgang	4.13	6.2	49.3	802	13	90.6	55
18	Neulchan	4.23	6.2	33.4	796	12.9	23.2	42.2
19	Neulchan-B	4.27	6.4	30.6	806	10.4	-	57.6
20	Olmil	4.24	6.7	38.6	757	10.5	69	30
21	Saekeumgang	4.23	6.6	49.8	788	10.2	69.5	35.9
22	Shinmichal1	4.21	6.7	33.7	800	12.7	26.9	51.1
23	Sinmichal	4.21	6.7	42	771	11.8	43.2	28.1
24	Sooan	4.18	6.2	48.4	802	12.1	68.5	52.3
25	Sugang	4.2	6.5	46.1	793	11	67.6	36.7
26	Taejoong	4.3	6.1	41.2	738	11.2	-	62.3
27	Tapdong	4.19	6.2	39.6	801	12.5	53.8	51.8
28	Wooju	4.18	6.2	44	760	11.6	-	66.3
29	Joongmo2008	4.16	6.2	44.5	826	18.1	90	73.6
30	Joongmo2013	4.24	6.6	49.1	797	11.7	46.1	41.9
31	Joongmo2015	4.19	6.5	43.9	808	12.7	79.6	39.1
32	Junju416	4.2	6.2	44.6	731	-	-
33	Milyang46	4.14	6.1	45.6	795	15	85.6	66.9
34	Milyang47	4.13	6.3	43.6	802	13.2	84.3	54.5
35	73075	4.28	6.9	41.4	809	13.3	-	64.9
36	2621 antizana	-	-	-	-	-	-	-
37	Chinese Spring	5.7	6.14	36.8	-	14.8	-	60.9
38	Chukoku122	-	-	-	-	-	-	-
39	CMH81A.896-1B-2Y-2B-3Y-0B	-	-	-	-	-	-	-
40	Eocorague	-	-	-	-	-	-	-
41	FRONTANA	4.3	6.12	46.1	766	16.5	-	63.8
42	Garnet	4.28	6.1	46.3	795	11.7	56.4	69.9
43	Genaro81	5.6	6.18	-	-	13.8	-	61.9
44	Icw77-0117-k-1ap-0ap-4ap-2	-	-	-	-	-	-	-
45	Insignia	4.29	6.14	45.3	788	13.4	-	59.8
46	Junggye4742	4.2	6.2	39.5	783	13.9	72.5	42.9
47	Junggye5336	-	-	-	-	-	-	-
48	Keas	4.28	6.1	34.1	791	13.1	41.4	70.1
49	Kosava	5.6	6.17	37.7	799	11.4	-	53.7
50	Lu mai 2	-	-	-	-	-	-	-
51	Mk2565	5.1	6.8	49.3	812	13.3	77.7	71
52	Mk2573	-	-	-	-	-	-	-
53	NING MAI 50	4.26	6.5	34.5	805	13.8	86.9	43.4
54	Norin 61	5.6	6.1	39	727	11.9	-	56.4
55	Norin 67	4.27	6.5	36.2	779	12.4	-	62.8
56	NOROC	5.4	6.8	37	764	12.2	-	60
57	Rio-Blanco	5.3	6.12	38.6	784	11.8	-	71
58	Sammartin	5.2	6.8	36.7	-	-	-	-
59	SANDO 7	5.7	6.11	-	-	15.5	-	70.2
60	Sonora64	-	-	-	-	-	-	-
61	Sumai3	4.28	6.1	41.9	772	16.4	-	69.8
62	U00010123	-	-	-	-	-	-	-
63	U00010257	4.26	6.7	53.8	788	16	69.2	68.6
64	World seeds 1809	-	-	-	-	-	-	-
65	Xuzhou 25	5.1	6.14	47.5	-	14.1	-	62.3
66	YANA	4.28	6.8	39.8	807	12.9	-	66.7
67	Yecora	4.27	6.8	42.9	799	15.6	-	68.5
68	YW3189-B-B-B-139-1	4.1	5.28	51.4	817	17.6	79.5	82
69	YW3189-B-B-B-88-1	4.1	5.28	50.3	812	17.2	71.5	68.8
70	YW3189-B-B-B-157-1	4.8	5.27	48.7	798	18.6	56.9	65.8
71	Milyang52	4.7	5.28	47.4	785	15.4	81	63
72	Milyang54	4.17	5.3	37.7	699	9.5	60.3	22
73	RTLh-01	4.21	5.26	38.7	-	11.8	-	51
74	RTL-02	4.2	5.25	41.6	852	10.6	-	55
75	RTL-03	4.2	5.27	43.4	875	11.8	-	59.6
76	RTL-04	4.22	5.28	38.2	865	11.5	-	58.1
77	RTL-05	4.21	5.28	43.3	853	11.9	-	55.6
78	RTL-06	4.17	5.25	46.2	847	11.7	-	57.8
79	RTL-07	4.22	5.28	45.3	-	10.4	-	60.3
80	RTL-08	4.22	5.28	41.9	851	11.8	-	57.5
81	RTL-09	4.21	5.28	42.1	828	11.4	-	59.7
82	RTL-10	4.19	5.26	46.3	857	11.1	-	56
83	RTL-11	4.2	5.27	41.2	-	10.4	-	54.8
84	RTL-12	4.21	5.26	38.7	-	9.1	-	57.3
85	RTL-13	4.2	5.25	41.6	852	10.3	-	54.8
86	RTL-14	4.2	5.27	43.4	875	12.6	-	55.6
87	RTL-15	4.22	5.28	38.2	865	12.4	-	53.5
88	RTL-16	4.21	5.28	43.3	853	14	-	58.9
89	RTL-17	4.17	5.25	46.2	847	13.4	-	54.1
90	RTL-18	4.22	5.28	45.3	-	13.7	-	57.4
91	RTL-20	4.22	5.28	41.9	851	12.7	-	52.6
92	RTL-21	4.21	5.28	42.1	828	14.4	-	55.8
93	RTL-22	4.19	5.26	46.3	857	13.6	-	63.6
94	RTL-23	4.2	5.27	41.2	-	12.7	-	60
a HD; Heading date, b MD; maturity date, c TGW; Thousand grain weight, d LW; Liter weight, e PC; Protein content, f GI; Gluten index, g SDSS; SDS-sedimentation value, h RTL; Rye-translocation line

## Sheet: S2
S2. Functional and linked KASP markers from references, selected for foreground selection in MAS.
No.	Primer Name	Chr	Gene	Category	FAM primer	HEX primer	Common primer	Reference
1	Rht-B1_SNP	4B	Rht-B1	PHa	CCCATGGCCATCTCCAGCTG	CCCATGGCCATCTCCAGCTA	TCGGGTACAAGGTGCGGGCG	Wilhelm et al. (2013)
2	Rht-D1_SNP	4D	Rht-D1	PH	CATGGCCATCTCGAGCTGCTC	CATGGCCATCTCGAGCTGCTA	CGGGTACAAGGTGCGCGCC	Ellis et al. (2002)
3	Rht-B1_197IND	4B	Rht-B1	PH	CATGCCCTAACTTGTCTATC	CAGCACGAATATTTACCAAGG	CACGCAAGTACTTGAAATGT	Wilhelm et al. (2013)
4	Rht-B1_160IND	4B	Rht-B1	PH	TGTCGTGTGCGTAGCAGCGCTCT	TGGTGGGCTCAGGATTTGTA	AGACAAACTTCGCCATCCAG	Wilhelm et al. (2013)
5	Lr34_TCCIND	7D	Lr34	Rust	GGTATGCCATTTAACATAATCATGAA	GGTATGCCATTTAACATAATCATGAT	TACTATATGGGAGCATTATTTTTTTCC	Lagudah et al. (2009)
6	Lr34jagger	7D	Lr34	Rust	TGTAATGTATCGTGAGAGATTTGCAG	ATTGTAATGTATCGTGAGAGATTTGCAT	GATCATTATCTGACCTGTGCGAATGAATA	Lagudah et al. (2009)
7	Sr2_ger9 3p	3B	Sr2	Rust	GTGCGAGACATCCAACACTCAC	GTGCGAGACATCCAACACTCAT	CTCAAATGGTCGAGCACAAGCTCTA	Mago et al. (2011)
8	Sr36/Pm6_8068	2B	Sr36/Pm6	Rust	CATTGTCATTCTCATCATTATACGCATCA	GTCATTCTCATCATTATACGCATCG	AAAGGGCAGTGCTTATGACGACGAT	Distelfeld et al. (2006)
9	WKS	6B	Yr36	Rust	CGATGCTTCTCTCAGAACGA	TTCGATGCTTCTTGTAGAACACA	GATTGGTTCTTGACGTATGTTTT	Yuan et al. (2012)
10	Psy1Da-g	7A	Psy/Sr25	Rust	AAAGTTCTTGTACCTCGCCTTCTTG	CAAAGTTCTTGTACCTCGCCTTCTTA	TATGCCAGCCCTTCAAGGACATGAT	Qaseem et al. (2018)
11	ubw14	7B.	Lr14a	Rust	CTACACTAGTACTACTTTGAGACAATTTTTT	ACACTAGTACTACTTTGAGACAATTTTAA	AACAAACTCCAGTGTAAACACCACAGTTT	Terracciano et al. (2013)
12	Lr47-1	7B	Lr47	Rust	GCAGCCTGGTAAGTTATCTGAC	GCAGCCTGGTAAGTTATCTGAG	GCCTGGATTCAAGAGAACAT	Rasheed et al. (2016)
13	Lr68-2	7B.	Lr68	Rust	CGTGTCTTGGACCTGAGCAAT	CGTGTCTTGGACCTGAGCAAC	TGACCTGAGTCCCGTCAAGA	Rasheed et al. (2016)
14	Lr21 GQ504819-1346-C/T	1D	Lr21	Rust	CCTTGTTTATTATTTACACTTTAATACTATTTT	CCTTGTTTATTATTTACACTTTAATACTATTTC	CAAATGGGTATGTCTGTCACATGTCTA	Neelam et al. (2013)
15	Yr15-R5	1B	Yr15-1	Stripe rust	AGTCAACTTGGA TTACACTGAAGT	AGTCAACTTGGA TTACACTGAAGC	AGATATCACACTGAACATACTGATGAG	Ramirez-Gonzalez et al. (2015)
16	Yr15-R8	1B	Yr15-2	Stripe rust	CAGATCCCCGGTTCTCTCAAAG	CAGATCCCCGGTTCTCTCAAAGA	CCCCCAAATGATCGAGAATA	Ramirez-Gonzalez et al. (2015)
17	snp3BS-8	3B	Fhb1	Fusarium	CACATGCATTTGCAAGGTTGTTATCC	CACATGCATTTGCAAGGTTGTTATCG	CAAAGCAGCCTTAGGTCAATAGTTTGAAA	Bernardo et al. (2012)
18	UMN10_SNP	3B	Fhb1	Fusarium	GAATTACTCATTTTTAGATTTGTCTACATACA	GAATTACTCATTTTTAGATTTGTCTACATACG	GAAGTTCATGCCACGCATATGCTAGTA	Liu et al. (2008)
19	PFT_KASP	3B	Fhb1	Fusarium	AGCTGGGAATGAAGGAACCTGC	AGCTGGGAATGAAGGAACCTGT	GTGATTATCTCTCCCATCTTATGTTTGCAA	Singh et al. (2019)
20	TaHRC-Kasp	3B	Fhb1	Fusarium	GCT CAC GTC GTG CAA ATG GT	TTG TCT GTT TCG CTG GGA TG	CTT CCA GTT TCT GCT GCC AT	Su et al. (2018)
21	Tsn1	5B	Tsn1	Tan spot		CTATTCGTAATCGTGCCTTCCGG	CTGCCCTTCACTTAGCCTGTCAC	Faris et al. (2010)
22	Dreb-B1	3B	Dreb	Drought	CCTGCGCACTTTCTTCTTCCTGT	CTGCGCACTTTCTTCTTCCTGG	TTTCACCTTGTGATATGGATTGCCTTGAT	Wei et al. (2009)
23	1fehw3	6B	1-feh-w3	Drought	CTCCCCCCTTCCTTCTGTCC	CTCCCCCCTTCCTTCTGTCT	AGGAAGACGGCCCGAGCTTT	Zhang et al. (2015)
24	TaSdr-B1	2A	TaSdr-D1	PHSb	TCAGCAGACTTCGACTCGCA	TCAGCAGACTTCGACTCGCG	AGGATCTCGTTGGCCTTGACG	Zhang et al. (2014b)
25	Vp1B1-193	3B	Vp1B1	PHS	GGCATCGTCTATCTAGCAACGC	CATATGATGGGAATCCGGGAG	GCGCACTACGAATGCATGCTAC	Yang et al. (2007)
26	Vp1B2-83	3B	Vp1B1	PHS	CGCTCTTATATTAGTTTACGGAGGGAG	CTCATTTTGATAGCTCTAGCTAA	CTTCTTCCGAAGTGTATCATATG	Yang et al. (2007)
27	KASPTaPHS1-646	3A	PHS1-646	PHS	GGTGGAACAGATGCAACTAAAGG	GGTGGAACAGATGCAACTAAAGA	GTGAGTGTTATATGAAACTAATGATCCATT	Liu et al. (2013)
28	PHS1-666	3A	TaPHS1-666	PHS	GTGAGTGTTATATGAAACTAATGATCCATTT	GTGAGTGTTATATGAAACTAATGATCCATTA	ACCGGGTGGAACAGATGCAACTAAA	Liu et al. (2013)
29	TaMoc-2433	1A	TaMoc-A1	PHS	CGGAAAGCTTAGAAATGCACGG	CGGAAAGCTTAGAAATGCACGT	CACCTCTAATCCAATGCGATCC	Zhang et al. (2015)
30	TaMFT_721J	3A	TaMFT-A1	PHS	GTCCTTCCAGAGGCCATGTCG	GTCCTTCCAGAGGCCATGTGC	ACAGGTCAAGCGACACGTAGCC	Liu et al. (2013)
31	TaMFT_1617R	3A	TaMFT-A1	PHS	CGTGCATGCAGCCTACGCATACGTA	CGTGCATGCAGCCTACGCATACGTG	TGATCCATGCACGCATCAGCGATCG	Rasheed et al. (2016)
32	1RS:1AL_8035	1A	1RS:1AL	1A/1R	CTTGAGGTCATGACAGAATCTGC	CTCTTGAGGTCATGACAGAATCTGT	CAAGAAACCCTGATCCTTCAAACAAGATA	Singh et al. (1990)
33	1RS:1BL_6110	1B	1RS:1BL	1B/1R	GGAGCAGGTCCAGATCGCG	CGGAGCAGGTCCAGATCGCA	GAAGCTCCGGTAGATGGAGGCTA	Zeller (1973)
34	Glu-D1d_SNP	1D	GluD1	Quality	ATAGTATGAAACCTGCTGCGGAG	ATAGTATGAAACCTGCTGCGGAC	TACTAAAAAGGTATTACCCAAGTGTAACTT	Liu et al. (2008b)
35	GCP_DUP	6B	Gpc-B1	Quality	CAAGAGGGGAGAGACATGTTACTTA	CAAGAGGGGAGAGACATGTTACTTT	GATTATGGGAGTAGGTTGGTGAGATAAAA	Uauy et al. (2006)
36	Pinb-D1_INS	5D	Pinb-D1	Quality	CTCATGCTCACAGCCGCC	CCTCATGCTCACAGCCGCT	GTCACCTGGCCCACAAAATG	Giroux and Morris (1998)
37	Pina-D1_INS	5B	Pina-D1	Quality	AACTGCCAACAACTTCGCTA	TTGTCTAGTACCCCGCTCTG	ATGAAGGCCCTCTTCCTCATAGG	Giroux and Morris (1997)
38	TaSus2-2B_SNP	2B	Sus2	Quality/TGWc	GCGGTGTCCTTGAGCTTCTCA	GCGGTGTCCTTGAGCTTCTCG	ACTGCTGAGTACAATGCCGCGATCCCA	Jiang et al. (2011)
39	PPO-A1	2A	Ppo-A1	Quality	GACGACCTGCACCTTTCTGT	GACGACCTGCACCTTTCTGA	CAAACCCACGCAGGGACAAGT	He et al. (2007)
40	PPO-D1_SNP	2D	Ppo-D1	Quality	AAGAGACCAGCAGATCGATG	AAGAGACCAGCAGATCGATC	TACTGGCCTGGCGGTACATGAT	He et al. (2007)
41	LoxB1_SNP	4B	Lox-B1	Quality	TCCTCGGCGGCAGCGCCGAG	TCCTCGGCGGCAGCGCCGAC	TCGGGTCGTTGGCGTTGGGCTT	Geng et al. (2012)
42	Zds-A1_SNP	2A	Zds-A1	Quality	CCATGCACTTGGACCTAATAG	CCATGCACTTGGACCTAATAC	AAGCCGACGCGGATTTTGAA	Dong et al. (2012)
43	Glu-Ax1/x2*_SNP	1A	Glu-A1	Quality	AAGTGTAACTTCTCCGCAACG	ACCTAAGTGTAACTTCTCCGCAACA	CGAAGAAGCTTGGCCTGGATAGTAT	Rasheed et al. (2016)
44	Glu-Ax2_IND	1A	Glu-A1	Quality	ATTCTTGTTGTCCTTGTCCTGGCT	CTTGTTGTCCTTGTCCTGGCC	GGTTTCATACTATCCAGGCCAAGCTT	Ma et al. (2003)
45	PODA1_462_SNP	3A	TaPod-A1	Quality	TTCGACGACCGGCTCTTCCCG	TTCGACGACCGGCTCTTCCCA	AAGGAAGTCCGGGCTCATGGTGGGGTCA	Wei et al. (2015)
46	PsyB1c	7B	Psy-B1	Quality	GTGAAGAATAAAGGCCTCAT	GTGAAGAATAAAGGCCTCAC	GCCTAATTTGATTCTTCCACAC	He et al. (2009)
47	Wx-B1-IND	7B	Wx-B1	Quality		CATCCGTATGTAGTCCCAATTGAA	ACCCTAGTATTGTACCTTAGTTCAAAC	Saito et al. (2009)
48	Pinb2-v2-3	5D	Pinb2-V	Quality	GCACCTAGCAATAAATAAACGGGAG	AGAAAAAAGCCATTAAATAAACGGGAC	TGTTTTGGTGGTGGTGAAGATGA	Chen et al. (2010)
49	Pds-B1_2002	1B	TaPds-B1	Quality	CATATTGCAATCTCTATGAGGCTAC	CATATTGCAATCTCTATGAGGCTAG	GGCAGAAATGTATTAGCAAACAAAACC	Rasheed et al. (2016)
50	LYCB1_3765_SNP	1B	TaLyc-B1	Quality	GGATCGATCTCCTGAACAGGATGTG	GGATCGATCTCCTGAACAGGATGTC	CGAAAGCGTCGAACCAAGGAATCCTC	Rasheed et al. (2016)
51	BX13-1510		Bx13	Quality	CAACGACCGGGACAAGGGCAAC	CAACGACCGGGACAAGGGCAAT	CTGTGGAGAGGTTGGGTAGTACCC
52	7OE-866	1B	Bx7OE	Quality	GTGGAATATTAGTGATGGCGTGAG	GTGGAATATTAGTGATGGCGTGAC	TTCTTCTCTCGTTGGCCTTATCGC	Ragupathy et al. (2008)
53	PsyA1-IND	7A	Psy-A1	Quality	GCCATCTACGGTAATCTGAAAATTCG	GCCATCTACGGTAATCTGAAAATTCA	CAATGGAGGGTCCAAACCAGGCAT	He et al. (2009)
54	Bx7OE_SNP	1B	Glu-B1a1	Quality	GAAGGTGACCAAGTTCATGCTGCCTAGAGCCCATCTCAGATTTCAGC	GAAGGTCGGAGTCAACGGATTGGTCGATGAGATCCCGTACA	GTTCTTCTATGATCTCCAAGTGTTTC	Rasheed et al. (2016)
55	Wx-D1d-Kasp	1D	Wx-D1	Quality	GAAGGTGACCAAGTTCATGCTGTGGAGGGGCGCAAGATCAACTGG	GAAGGTCGGAGTCAACGGATTGTGGAGGGGCGCAAGATCAACTGA	CGCGTAGTAGGGGCTCACCGTCA	Yi et al. (2017)
56	TaPpdDD001	2D	Ppd-D1	Photoperiod	CAAGGAAGTATGAGCAGCGGTT	AAGAGGAAACATGTTGGGGTCC	GCCTCCCACTACACTGGGC	Beales et al. (2007)
57	TaPpdDI001	2D	Ppd-D1	Photoperiod	TGACTTATACACCCGGACGGAG	GAACATGACACACAACCAACGC	TGTTAATTAATTTGTACTGGCTCGGTA	Beales et al. (2007)
58	TaPpdDD002	2D	Ppd-D1	Photoperiod	CGAGCAGCTCCCGACG	GGGCGAGCAGCTCCAAC	GGTCTCCAATCAAGGCGGT	Beales et al. (2007)
59	TaPpdBJ001	2B	Ppd-B1	Photoperiod	CCGTTTTCGCGGCCTT	GACGTTATGAACGCTTGGCA	GGGTTCGTCGGGAGCTGT	Beales et al. (2007)
60	GS100-1027IND	2A	Ppd-A1	Photoperiod	CCAGTATCTTTAGATGCACCATGC	GCCGGCGGCTAAAAGG	CTATACAATGCTAAAGTCGCACAT	Beales et al. (2007)
61	GS105-1117IND	2A	Ppd-A1	Photoperiod	GGGGACCAAATACCGCTCG	CGTTTGGTGGTGGACGGG	GAAACAGAGGGGTGGTTTGAAAT	Beales et al. (2007)
62	Vrn-A1_9K0001	5A	Vrn-A1	Vernalization	AGAGTTTTCCAAAAAGATAGATCAATGTAAAT	GAGTTTTCCAAAAAGATAGATCAATGTAAAC	GTTAGTAGTGATGGTCCAATAATGCCAAA	Yan et al. (2004)
63	Exon7_C/T_Vrn-A1	5A	Vrn-A1	Vernalization	GAGTTTGATCTTGCTGC GCCG	CTGAGTTTGATCTTGCTGC GCCA	CTTCCCCACAGCTCGTGGAGAA	Díaz et al. (2012)
64	Vrn-B1_A	5B	Vrn-B1	Vernalization	GGCAGCTAATGTGGGGTAGTCA	GGCAGCTAATGTGGGGTAGTCT	CACAGGCTTTCCTATCATTCGT	Milec et al. (2012)
65	Vrn-B1_B	5B	Vrn-B1	Vernalization	GCGCAAGCGGGAGCTACATG	GCGCAAGCGGGAGCTACATC	GCCATGAACAACAAAGGGGGTGGT	Milec et al. (2012)
66	Vrn-D1-D1a_A	5D	Vrn-D1	Vernalization	ATCATTCGAATTGCTAGCTCCGG	ATCATTCGAATTGCTAGCTCCGC	GCCTGAACGCCTAGCCTGTGTA	Díaz et al. (2012)
67	Vrn1_new	5A	Vrn-A1	Vernalization	CAACTCCTTGAGATTCAAAGATTCAAG	GCAACTCCTTGAGATTCAAAGATTCAAA	CATCCTGCATCTGCAGGCATCTC	Díaz et al. (2012)
68	Vrn-A1b-Marq	5A	Vrn-A1	Vernalization	GTTTTGGCCTGGCCATCCTCC	GTTTTGGCCTGGCCATCCTCA	TATCAGGTGGTTGGGTGAGGACGT	Yan et al. (2004)
69	TaGS-D1	7D	TaGs3-D1	Grain size	GCCAAGAAATGTCGCTCTCAG	GCCAAGAAATGTCGCTCTCAT	CAAGAATTTTGGGACGGAGGGA	Zhang et al. (2014b)
70	CWI_4A_1523	4A	CWI-4A	Grain size	TTTATTTAAAATTTGATGAACTTTTCATAAAC	TTTATTTAAAATTTGATGAACTTTTCACAAAT	CATCGAATTGAAGAAAAGTTCACGC	Jiang et al. (2015)
71	CWI_5D_312	5D	CWI-5D	Grain size	TAGAGGAGATCAAGTCATTGCGTGC	TAGAGGAGATCAAGTCATTGCGTGG	GGCCTTGTTGCTGACATTGACGTGCT	Jiang et al. (2015)
72	TGW6-1050-AL1	6A	TGW6	TGW	CTGCGCTTCACCAACGGTGTTGACGTCG	CTGCGCTTCACCAACGGTGTTGACGTCA	GTGAAGTAGACTTGACCCGTAACTTGAT	Hanif et al. (2016)
73	TaCKX-D1	3D	TaCKX-D1	TGW	CGTCGATAGTCTCATGCATATGC	ATGCATGCATGCATGCGT	AACTTTTCACGGTGAACAG	Zhang et al. (2012)
74	TaGASR	1A	TaGASR7-A1	TGW	CACGGTAGAGGAGCCGGTTC	ATAACTGCTCACCCCCCACC	ATATGTAGGGCAGGAAGGGC	Dong et al. (2012)
a PH; Plant height, PHS; b Pre-harvest sprouting, c TGW; Thousand grain weight

## Sheet: S3
S3. Functional and linked gel-based markers from references, selected for foreground selection in MAS.
No.	Marker Name	Chr	Gene	Category	Forward primer	Reverse primer	Reference
1	MFT-3A	3A	MFT	PHSa	GTAGCGGGTGAAATCTGCAT	GGGACGTACGAGGGTGTAGA	Nakamura et al. (2011)
2	STS-Myb10	1D	Tamyb10-D1	PHS	GAAGGTGACCAAGTTCATGCTGTGGAGGGGCGCAAGATCAACTGG	GAAGGTCGGAGTCAACGGATTGTGGAGGGGCGCAAGATCAACTGA	Lang et al. (2021)
3	Tamyb10-A1	1A	Tamyb10-A1	PHS	CAAGGAAGTATGAGCAGCGGTT	AAGAGGAAACATGTTGGGGTCC	Himi et al. (2012)
4	Wx-A1	4A	Wx-A1	GBSSb	TCGTGTTCGTCGGCGCCGAGATGG	CCGCGCTTGTAGCAGTGGAAGTACC	Saito and Nakamura (2005)
5	Wx-B1	4A	Wx-B1a	GBSS	CTGGCCTGCTACCTCAAGAGCAACT	GGTTGCGGTTGGGGTCGATGAC	Saito et al. (2009)
			Wx-B1b		CGTAGTAAGGTGCAAAAAAGTGCCACG	ACAGCCTTATTGTACCAAGACCCATGTGTG
6	Wx-D1	7D	Wx-D1	GBSS	ACAGGATCTCTCCTGGAAG	GCAAGGAAAATAGTGAAGC	Shariflou et al. (2001)
7	TaHRC-GSM	2D	TaHRC	FHBc	ATTCCTACTAGCCGCCTGGT	ACTGGGGCAAGCAAACATTG	Su et al. (2018)
a PHS; Pre-harvest sprouting, b GBSS; Granule‐bound starch synthase, c FHB; Fusarium head blight

## Sheet: S4
S4. Genotyping of functional and linked markers for PHS foreground selection in wheat breeding across 94 domestic cultivars and germplasms
No.	Marker name		TaMFT_1617R	TaMFT-3A	STS-Myb10
	Chromosome		3A	3A	1D
	Gene		TaMFT-A1	MFT	Tamyb10-D1
	FAM allele	Allele	CS type(A)	Zen-type	243
	/Type	Phenotype	Susceptible(0)	Resistant(1)	Resistant(1)
	HEX allele	Allele	Zen-type(G)	CS-type	No band
	/Type	Phenotype	Resistant(1)	Susceptible(0)	0
	Reference		Rasheed et al. (2016)	Nakamura et al. (2011)	Lang et al. (2021)
1	Alchanmil		0	0	1
2	Ariheukchal		0	0	1
3	Baekchal		1	1	1
4	Baekjoong		1	1	0
5	Baekkang		1	1	0
6	Chokwang		0	0	1
7	Dabunmil		1	1	1
8	Geurumil		0	0	1
9	Hanbaekmil		0	0	0
10	Hwanggeumal		1	1	0
11	Jeokjoongmil		0	0	1
12	Joeunmil		0	0	0
13	Johan		0	0	1
14	Jokyoung		1	1	0
15	Jonong		0	0	1
16	Jopummil		0	0	0
17	Keumgang		1	1	0
18	Neulchan		0	0	1
19	Neulchan-B		0	0	1
20	Olmil		0	0	1
21	Saekeumgang		1	1	1
22	Shinmichal1		0	0	1
23	Sinmichal		1	1	1
24	Sooan		0	0	0
25	Sugang		0	0	1
26	Taejoong		0	0	1
27	Tapdong		0	0	1
28	Wooju		1	1	0
29	Joongmo2008		1	1	0
30	Joongmo2013		0	0	0
31	Joongmo2015		1	1	0
32	Junju416		0	0	1
33	Milyang46		1	1	0
34	Milyang47		0	0	1
35	YW3189-3B-139-1		1	0	0
36	YW3189-3B-88-1		1	1	0
37	YW3189-3B-157-1		1	1	0
38	Miryang52		1	1	0
39	Miryang54		1	1	1
40	73075		0	0	1
41	2621 antizana		0	0	0
42	Chinese Spring		0	0	1
43	Chukoku122		1	1	0
44	CMH81A.896-1B-2Y-2B-3Y-0B		0	0	1
45	Eocorague		0	0	0
46	FRONTANA		0	0	0
47	Garnet		0	0	0
48	Genaro81		0	0	0
49	Icw77-0117-k-1ap-0ap-4ap-2		0	0	0
50	Insignia		0	0	0
51	Junggye4742		1	1	1
52	Junggye5336		1	1	1
53	Keas		0	0	0
54	Kosava		0	0	1
55	Lu mai 2		0	0	0
56	Mk2565		0	0	0
57	Mk2573		0	0	0
58	NING MAI 50		1	1	1
59	Norin 61		0	0	0
60	Norin 67		0	0	0
61	NOROC		0	0	1
62	Rio-Blanco		1	1	0
63	Sammartin		0	0	0
64	SANDO 7		0	0	0
65	Sonora64		0	0	1
66	Sumai 3(IT269408)		0	0	1
67	U00010123		0	0	0
68	U00010257		0	0	0
69	World seeds 1809		0	0	1
70	Xuzhou 25		0	0	0
71	YANA		0	0	1
72	Yecora		0	0	0
73	RTL1a		0	0	0
74	RTL2		0	0	0
75	RTL3		0	0	0
76	RTL4		0	0	0
77	RTL5		0	0	0
78	RTL6		0	0	0
79	RTL7		0	0	0
80	RTL8		0	0	0
81	RTL9		0	0	0
82	RTL10		0	0	0
83	RTL11		0	0	0
84	RTL12		0	0	0
85	RTL13		0	0	0
86	RTL14		0	0	0
a RTL; Rye-translocation line
